# Supplementary material
Source: PubMed Central journal article supplement (PMC2082050)

**A**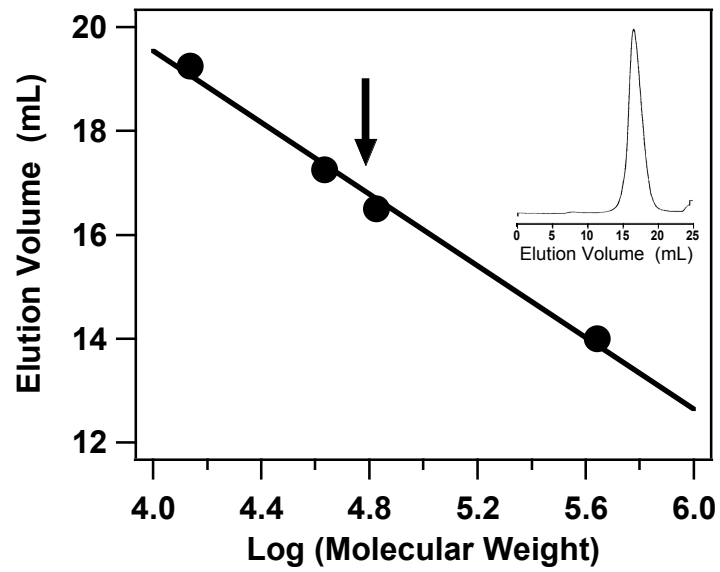**B**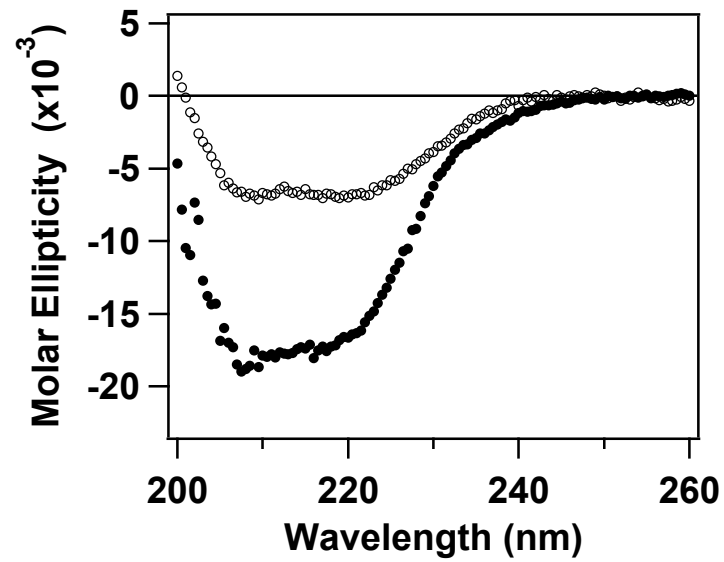**C**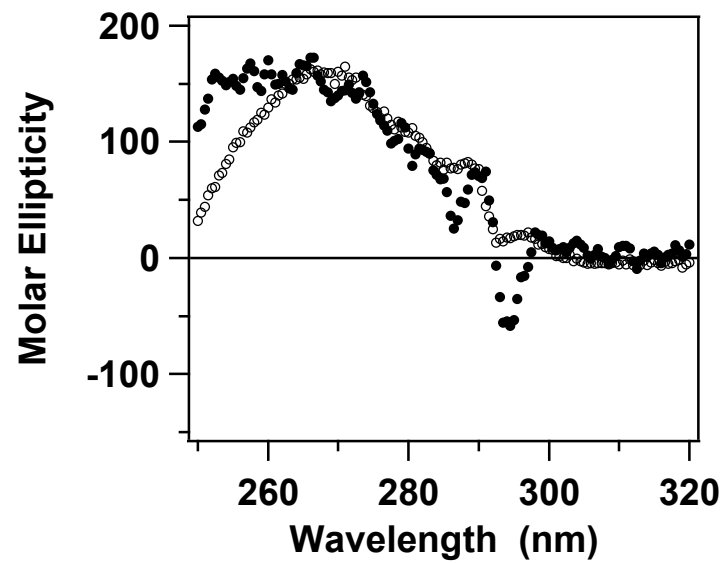

Supplement: NIHMS32823-supplement-01.pdf [file NIHMS32823-supplement-01.pdf]
